# Supplementary material for: Heat stress response in Chinese cabbage (Brassica rapa L.) revealed by transcriptome and physiological analysis
Source: PeerJ. 2022 May 25;10:e13427. doi: 10.7717/peerj.13427 (PMC9147330; doi:10.7717/peerj.13427)
Supplement: Supplemental Information 2 [file peerj-10-13427-s002.xlsx]

## Sheet: Sheet1
Table S1. Statistical power of transcriptome sample size
Samples	Samples description	Coefficient of variation	Number of samples (n)	Statistical power（effect, c=2）
S268CA001	268 CK 1	0.116027	1	0.494269
S268CA002	268 CK 2		2	0.785682
S268CA003	268 CK 3		3	0.920717
S268MA201	268 HT-4 1	0.0651944	1	0.557386
S268MA202	268 HT-4 2		2	0.84518
S268MA203	268 HT-4 3		3	0.953987
S268MA401	268 HT-8 1	0.0529433	1	0.56867
S268MA402	268 HT-8 2		2	0.854627
S268MA403	268 HT-8 3		3	0.958578
S268MA501	268 HT-10 1	0.0364818	1	0.580572
S268MA502	268 HT-10 2		2	0.86421
S268MA503	268 HT-10 3		3	0.963033
S268MA701	268 RC-4 1	0.05516	1	0.566773
S268MA702	268 RC-4 2		2	0.853064
S268MA703	268 RC-4 3		3	0.957832
S334CA001	334 CK 1	0.0622904	1	0.560234
S334CA002	334 CK 2		2	0.847598
S334CA003	334 CK 3		3	0.95518
S334MA201	334 HT-4 1	0.0635459	1	0.559015
S334MA202	334 HT-4 2		2	0.846566
S334MA203	334 HT-4 3		3	0.954673
S334MA401	334 HT-8 1	0.0457086	1	0.574386
S334MA402	334 HT-8 2		2	0.859278
S334MA403	334 HT-8 3		3	0.960766
S334MA501	334 HT-10 1	0.0758367	1	0.546105
S334MA502	334 HT-10 2		2	0.83538
S334MA503	334 HT-10 3		3	0.949018
S334MA701	334 RC-4 1	0.050321	1	0.570827
S334MA702	334 RC-4 2		2	0.856393
S334MA703	334 RC-4 3		3	0.959414
