# Supplementary material for: Heat stress response in Chinese cabbage (Brassica rapa L.) revealed by transcriptome and physiological analysis
Source: PeerJ. 2022 May 25;10:e13427. doi: 10.7717/peerj.13427 (PMC9147330; doi:10.7717/peerj.13427)
Supplement: Supplemental Information 3 [file peerj-10-13427-s003.xlsx]

## Sheet: Sheet1
Table S2. Genes up-regulated in HT-4, HT-8, HT-10 and RC-4
gene_name	S334-CK_vs_S268-CK_DESeq2_log2FC	S334-CK_vs_S268-CK_regulated	S334-HT-4_vs_S268-HT-4_DESeq2_log2FC	S334-HT-4_vs_S268-HT-4_regulated	S334-HT-8_vs_S268HT-8_DESeq2_log2FC	S334-HT-4_vs_S268-HT-4_regulated	S334-HT-10_vs_S268-HT-4_DESeq2_log2FC	S334-HT-10_vs_S268-HT-4_regulated	S334-RC-4_vs_S268-RC-4_DESeq2_log2FC	S334-RC-4_vs_S268-RC-4_regulated	KOG_class_annotation	Description
BraA01g008520.3C.gene	1.60173	normal	2.9842	up	2.52502	up	2.62932	up	2.06316	up	--	--
BraA01g024540.3C.gene	--	--	5.76935	up	6.42293	up	6.9467	up	7.39212	up	--	--
BraA01g027140.3C.gene	-0.108015	normal	1.45795	up	2.88197	up	2.3279	up	1.67057	up	--	Probable purine permease 18, PUP18
BraA01g034070.3C.gene	--	--	5.31636	up	7.15761	up	8.38086	up	7.77737	up	--	--
BraA01g035290.3C.gene	--	--	5.02389	up	3.03751	up	3.04044	up	3.89568	up	--	--
BraA02g001450.3C.gene	1.3332	normal	2.14744	up	2.21433	up	1.40293	up	1.07158	up	--	ACT domain-containing protein ACR12, ACR12
BraA03g000780.3C.gene	0.483502	normal	1.61845	up	2.68025	up	2.7146	up	2.40209	up	--	--
BraA03g001450.3C.gene	0.924066	normal	1.66274	up	1.4593	up	1.76176	up	1.5857	up	--	DNA gyrase subunit B, chloroplastic, GYRBC
BraA03g005570.3C.gene	--	--	7.95455	up	7.85204	up	7.17862	up	8.32391	up	--	--
BraA03g019670.3C.gene	1.17844	normal	1.77001	up	1.80405	up	2.4231	up	2.16447	up	--	L-type lectin-domain containing receptor kinase IV.1, LECRK41
BraA03g027520.3C.gene	--	--	6.25607	up	7.52786	up	7.60345	up	7.31259	up	--	F-box/kelch-repeat protein At1g64840, At1g64840
BraA03g042450.3C.gene	0.900254	normal	1.93412	up	1.28365	up	1.42733	up	1.36578	up	--	Somatic embryogenesis receptor kinase 4, SERK4
BraA03g043230.3C.gene	--	--	5.29424	up	7.61614	up	7.22537	up	8.00554	up	--	--
BraA03g049170.3C.gene	1.33252	normal	1.86198	up	1.92443	up	1.67688	up	4.04389	up	--	Putative terpenoid synthase 7, TPS07
BraA04g013680.3C.gene	--	--	7.90994	up	8.06503	up	8.57708	up	8.24626	up	--	--
BraA04g026440.3C.gene	--	--	2.27621	up	2.75349	up	2.46846	up	1.34228	up	--	--
BraA05g001930.3C.gene	--	--	4.21439	up	2.29596	up	2.60794	up	3.9455	up	--	--
BraA05g006930.3C.gene	1.44599	normal	1.58204	up	2.0993	up	1.91391	up	2.10867	up	--	Calmodulin binding protein PICBP, PICBP
BraA05g018860.3C.gene	--	--	6.7129	up	7.52281	up	7.37637	up	8.13133	up	--	Scarecrow-like protein 5, SCL5
BraA05g023340.3C.gene	0.992444	normal	1.46654	up	2.32264	up	2.86483	up	4.21441	up	--	Ubiquinol oxidase 3, mitochondrial, AOX3
BraA05g036050.3C.gene	--	--	7.93004	up	8.97293	up	7.46818	up	8.5104	up	--	--
BraA06g003250.3C.gene	1.12723	normal	1.29919	up	1.50667	up	1.48311	up	1.80142	up	--	Formate--tetrahydrofolate ligase, THFS
BraA06g006870.3C.gene	1.86838	normal	2.65303	up	3.12104	up	2.05035	up	3.00655	up	--	Receptor-like protein kinase HAIKU2, IKU2
BraA06g016660.3C.gene	-0.909064	normal	1.25778	up	1.33726	up	1.68215	up	1.50562	up	--	Wall-associated receptor kinase 2, WAK2
BraA06g016670.3C.gene	0.142923	normal	2.03862	up	1.68835	up	1.95004	up	1.42849	up	--	Wall-associated receptor kinase 2, WAK2
BraA06g035820.3C.gene	1.43375	normal	1.71374	up	2.08944	up	1.86713	up	1.68018	up	--	Protein ENHANCED DOWNY MILDEW 2, EDM2
BraA06g037470.3C.gene	1.04815	normal	1.72637	up	1.47286	up	1.76803	up	1.82554	up	--	Probable disease resistance protein At5g66900, At5g66900
BraA06g039810.3C.gene	--	--	3.58262	up	3.65894	up	3.51944	up	3.99346	up	--	Putative F-box protein PP2-B2, PP2B2
BraA07g002010.3C.gene	-1.16193	normal	2.69388	up	2.95644	up	3.09499	up	3.4635	up	--	--
BraA08g020450.3C.gene	--	--	4.61866	up	5.86685	up	6.33225	up	5.4586	up	--	Disease resistance protein TAO1, TAO1
BraA08g027400.3C.gene	0.565317	normal	2.14226	up	1.53131	up	1.50802	up	1.24164	up	--	Wall-associated receptor kinase 5, WAK5
BraA09g025830.3C.gene	0.293338	normal	2.78773	up	5.16967	up	3.3703	up	3.9966	up	--	Cysteine-rich receptor-like protein kinase 36, CRK36
BraA09g039450.3C.gene	0.262293	normal	2.16839	up	3.04888	up	3.64454	up	2.94283	up	--	--
BraA09g042050.3C.gene	-0.795758	normal	1.20424	up	2.158	up	1.29897	up	1.05328	up	--	CASP-like protein ARALYDRAFT_485429, ARALYDRAFT_485429
BraA09g054080.3C.gene	-1.08293	normal	1.37631	up	1.70824	up	1.83902	up	1.69677	up	--	Tetraspanin-8, TET8
BraA10g016540.3C.gene	1.55069	normal	1.54934	up	2.58968	up	1.3251	up	2.07196	up	--	Protein PSY1, PSY1
Brassica_rapa_newGene_11271	--	--	5.73549	up	7.32223	up	6.51881	up	6.76414	up	--	--
Brassica_rapa_newGene_2298	--	--	5.42789	up	6.44816	up	6.06136	up	6.66414	up	--	--
Brassica_rapa_newGene_6553	--	--	5.10789	up	7.09841	up	5.34032	up	6.38651	up	--	--
Brassica_rapa_newGene_921	--	--	3.09622	up	4.46407	up	2.666	up	3.31477	up	--	--
BraA09g035020.3C.gene	0.912772	normal	1.10298	up	1.01921	up	1.27687	up	1.19761	up	Carbohydrate transport and metabolism	Mannosyl-oligosaccharide 1,2-alpha-mannosidase MNS3, MNS3
BraA03g009330.3C.gene	-0.322383	normal	1.05134	up	2.38638	up	2.57541	up	1.42945	up	Carbohydrate transport and metabolism;; Posttranslational modification, protein turnover, chaperones;; Intracellular trafficking, secretion, and vesicular transport	GDP-fucose transporter 1, GFT1
BraA10g002290.3C.gene	1.20911	normal	1.73386	up	1.75043	up	1.50463	up	1.1551	up	Cell cycle control, cell division, chromosome partitioning	Probable serine/threonine-protein kinase At1g54610, At1g54610
BraA05g039450.3C.gene	1.31967	normal	1.93797	up	1.91099	up	1.69189	up	2.88053	up	Cell wall/membrane/envelope biogenesis	Pectin acetylesterase 12, PAE12
BraA05g002320.3C.gene	-0.107495	normal	3.00351	up	6.18062	up	3.11128	up	4.88231	up	Function unknown	--
BraA09g024710.3C.gene	--	--	1.8886	up	3.31782	up	2.75218	up	4.28025	up	Function unknown	Ultraviolet-B receptor UVR8, UVR8
BraA04g007530.3C.gene	--	--	5.15921	up	6.60787	up	5.03973	up	6.40563	up	General function prediction only	ER membrane protein complex subunit 8/9 homolog, EMB2731
BraA06g016280.3C.gene	0.980257	normal	2.07575	up	1.83943	up	2.78897	up	1.68676	up	General function prediction only	Monosaccharide-sensing protein 1, MSSP1
BraA07g042320.3C.gene	--	--	5.84346	up	8.58907	up	6.22843	up	6.77141	up	General function prediction only	Organic cation/carnitine transporter 2, OCT2
BraA08g031490.3C.gene	1.3317	normal	4.38473	up	5.34769	up	3.09518	up	2.77164	up	General function prediction only	Protein DETOXIFICATION 36, DTX36
BraA09g006500.3C.gene	0.545388	normal	1.42634	up	2.53595	up	1.80033	up	1.1257	up	General function prediction only	--
BraA09g011050.3C.gene	--	--	5.77604	up	6.02779	up	5.09322	up	7.10041	up	General function prediction only	Receptor-like protein 6, RLP6
BraA09g040140.3C.gene	--	--	5.58361	up	6.33406	up	5.152	up	6.37964	up	General function prediction only	Pentatricopeptide repeat-containing protein At1g22960, mitochondrial, At1g22960
Brassica_rapa_newGene_5962	--	--	6.89819	up	10.0783	up	7.67011	up	9.2765	up	General function prediction only	Putative ribonuclease H protein At1g65750, At1g65750
BraA04g020160.3C.gene	-0.37203	normal	2.51663	up	3.07093	up	4.40666	up	1.90677	up	Inorganic ion transport and metabolism	Superoxide dismutase [Cu-Zn] 2, chloroplastic, CSD2
BraA08g012460.3C.gene	--	--	3.64706	up	4.88025	up	4.62457	up	6.69901	up	Inorganic ion transport and metabolism	Probable zinc transporter 12, ZIP12
BraA09g060730.3C.gene	1.09653	normal	1.92724	up	1.32274	up	1.29282	up	1.54325	up	Inorganic ion transport and metabolism	Copper chaperone for superoxide dismutase, chloroplastic/cytosolic, CCS
BraA09g062610.3C.gene	-0.263866	normal	1.56814	up	1.6035	up	2.5728	up	1.31135	up	Inorganic ion transport and metabolism	Superoxide dismutase [Cu-Zn] OS=Brassica oleracea var. capitata OX=3716, SODCC
BraA09g004180.3C.gene	--	--	4.3338	up	4.95345	up	4.76994	up	4.67048	up	Inorganic ion transport and metabolism;; Amino acid transport and metabolism;; Signal transduction mechanisms	Glutamate receptor 1.2, GLR1.2
BraA04g028130.3C.gene	--	--	5.69643	up	6.51064	up	6.20312	up	6.82208	up	Intracellular trafficking, secretion, and vesicular transport	PRA1 family protein B1, PRA1B1
BraA09g060790.3C.gene	0.957585	normal	1.31531	up	1.97065	up	1.32647	up	1.20515	up	Intracellular trafficking, secretion, and vesicular transport	SNARE-interacting protein KEULE, KEU
BraA01g028430.3C.gene	--	--	5.41473	up	6.83614	up	5.95575	up	6.50312	up	Posttranslational modification, protein turnover, chaperones	Protein farnesyltransferase/geranylgeranyltransferase type-1 subunit alpha, FTA
BraA03g053710.3C.gene	--	--	4.4786	up	6.85807	up	4.74176	up	5.98093	up	Posttranslational modification, protein turnover, chaperones	E3 ubiquitin-protein ligase RMA3, RMA3
Brassica_rapa_newGene_5547	1.28507	normal	1.91586	up	2.37346	up	1.43806	up	1.94705	up	Posttranslational modification, protein turnover, chaperones	Ubiquitin-conjugating enzyme E2 2 OS=Triticum aestivum OX=4565, UBC2
BraA07g032330.3C.gene	1.24126	normal	1.77375	up	1.59246	up	1.57903	up	1.36454	up	Replication, recombination and repair	DNA ligase 6, LIG6
BraA07g000900.3C.gene	0.962496	normal	2.07236	up	2.5437	up	3.79841	up	3.80256	up	RNA processing and modification	Probable RNA-dependent RNA polymerase 5, RDR5
BraA02g042360.3C.gene	--	--	4.00807	up	7.59469	up	7.42187	up	5.67272	up	RNA processing and modification;; Translation, ribosomal structure and biogenesis	--
BraA04g007060.3C.gene	0.996593	normal	2.4284	up	3.13759	up	1.84919	up	4.48944	up	Secondary metabolites biosynthesis, transport and catabolism	ABC transporter G family member 27, ABCG27
BraA02g044590.3C.gene	1.00558	normal	2.03915	up	2.41529	up	2.48881	up	1.46571	up	Signal transduction mechanisms	Oligopeptide transporter 4, OPT4
BraA03g059570.3C.gene	-1.27495	normal	1.45586	up	1.85647	up	2.73953	up	1.50353	up	Signal transduction mechanisms	Probable serine/threonine-protein kinase CST, CST
BraA05g008860.3C.gene	--	--	7.50475	up	8.29623	up	8.05642	up	8.88392	up	Signal transduction mechanisms	Probable disease resistance RPP8-like protein 2, RPP8L2
BraA06g020840.3C.gene	-0.0641205	normal	1.87667	up	2.53333	up	1.4177	up	1.01274	up	Signal transduction mechanisms	Mitogen-activated protein kinase 3, MPK3
BraA09g065690.3C.gene	--	--	3.44181	up	5.32335	up	7.02181	up	4.09806	up	Transcription	Histone-lysine N-methyltransferase MEDEA, MEA
