# Supplementary material for: Heat stress response in Chinese cabbage (Brassica rapa L.) revealed by transcriptome and physiological analysis
Source: PeerJ. 2022 May 25;10:e13427. doi: 10.7717/peerj.13427 (PMC9147330; doi:10.7717/peerj.13427)
Supplement: Supplemental Information 4 [file peerj-10-13427-s004.xlsx]

## Sheet: Sheet1
Table S3. Genes down-regulated in HT-4, HT-8, HT-10 and RC-4
gene_name	S334-CK_vs_S268-CK_DESeq2_log2FC	S334-CK_vs_S268-CK_regulated	S334-HT-4_vs_S268-HT-4_DESeq2_log2FC	S334-HT-4_vs_S268-HT-4_regulated	S334-HT-8_vs_S268HT-8_DESeq2_log2FC	S334-HT-4_vs_S268-HT-4_regulated	S334-HT-10_vs_S268-HT-4_DESeq2_log2FC	S334-HT-10_vs_S268-HT-4_regulated	S334-RC-4_vs_S268-RC-4_DESeq2_log2FC	S334-RC-4_vs_S268-RC-4_regulated	KOG_class_annotation	Description
BraA01g002360.3C.gene	-0.00303322	normal	-1.16793	down	-1.74572	down	-1.26065	down	-1.42264	down	Carbohydrate transport and metabolism	Beta-galactosidase 3, BGAL3
BraA01g008840.3C.gene	-0.725803	normal	-2.91504	down	-3.70118	down	-2.91681	down	-2.61236	down	Amino acid transport and metabolism	Probable tyrosine decarboxylase 2, At4g28680
BraA01g014470.3C.gene	-1.36625	normal	-2.1747	down	-3.82637	down	-2.07481	down	-1.43707	down	--	Ethylene-responsive transcription factor CRF2, CRF2
BraA01g023390.3C.gene	-1.17079	normal	-1.34356	down	-1.38112	down	-2.13666	down	-1.0604	down	--	--
BraA02g007880.3C.gene	-0.859792	normal	-1.13316	down	-1.59612	down	-1.23327	down	-1.26304	down	Amino acid transport and metabolism	Probable prolyl 4-hydroxylase 4, P4H4
BraA02g023730.3C.gene	-2.08197	normal	-3.82966	down	-3.52253	down	-4.58046	down	-4.53028	down	Intracellular trafficking, secretion, and vesicular transport	Exocyst complex component SEC5A, SEC5A
BraA02g035600.3C.gene	-1.97083	normal	-2.78237	down	-2.30133	down	-2.74849	down	-2.47836	down	--	--
BraA03g008780.3C.gene	-2.1523	normal	-2.01483	down	-2.28349	down	-2.63534	down	-3.71047	down	--	--
BraA03g028480.3C.gene	-1.16618	normal	-2.63591	down	-6.57439	down	-4.8987	down	-7.55756	down	Cell cycle control, cell division, chromosome partitioning	Cyclin-A2-4, CYCA2-4
BraA03g037800.3C.gene	-1.07406	normal	-1.80131	down	-2.31443	down	-2.22863	down	-1.16207	down	--	--
BraA03g040330.3C.gene	-0.88156	normal	-2.20962	down	-1.73781	down	-2.28155	down	-1.74322	down	--	40S ribosomal protein S10, mitochondrial, RPS10
BraA04g001870.3C.gene	-1.14547	normal	-1.64376	down	-1.79669	down	-1.11168	down	-1.2659	down	Function unknown	Probable U3 small nucleolar RNA-associated protein 11, At3g60360
BraA04g017260.3C.gene	-0.865759	normal	-1.94253	down	-4.97549	down	-2.57006	down	-3.62966	down	--	--
BraA05g017350.3C.gene	0.261885	normal	-1.17916	down	-2.26618	down	-1.95218	down	-2.08133	down	Intracellular trafficking, secretion, and vesicular transport;; General function prediction only	Dynamin-related protein 5A, DRP5A
BraA05g023920.3C.gene	-0.775343	normal	-1.5854	down	-2.07655	down	-1.27831	down	-1.78481	down	Amino acid transport and metabolism	Histidine biosynthesis bifunctional protein hisIE, chloroplastic, HISN2
BraA06g030600.3C.gene	-0.733704	normal	-1.77667	down	-2.41893	down	-2.20626	down	-1.51962	down	--	--
BraA06g032850.3C.gene	-0.122775	normal	-1.23217	down	-1.41826	down	-1.31822	down	-1.17606	down	--	DDT domain-containing protein DDR4, DDR4
BraA06g039430.3C.gene	-0.38611	normal	-1.56206	down	-3.8439	down	-1.70632	down	-2.91317	down	--	Expansin-A15, EXPA15
BraA06g040440.3C.gene	-0.709689	normal	-2.28688	down	-2.29675	down	-2.24066	down	-1.82502	down	General function prediction only	F-box protein At4g02760, At4g02760
BraA06g042010.3C.gene	-0.332883	normal	-1.62469	down	-3.0021	down	-3.15907	down	-1.47239	down	--	--
BraA07g003100.3C.gene	-1.55099	normal	-4.00008	down	-3.36421	down	-2.5809	down	-1.64665	down	Signal transduction mechanisms	Histidine kinase 1, AHK1
BraA07g015790.3C.gene	-1.74427	normal	-4.20329	down	-5.34994	down	-6.66761	down	-2.59542	down	--	Plastocyanin major isoform, chloroplastic, DRT112
BraA07g021120.3C.gene	-0.166128	normal	-1.45771	down	-1.69133	down	-1.07436	down	-1.89363	down	--	Thioredoxin-like 3-3, At3g53220
BraA07g027510.3C.gene	-0.479	normal	-1.60381	down	-1.29897	down	-1.85668	down	-2.17153	down	--	--
BraA07g034140.3C.gene	-0.550856	normal	-1.14512	down	-1.15517	down	-1.10099	down	-1.15845	down	Carbohydrate transport and metabolism	Fructokinase-like 2, chloroplastic, FLN2
BraA07g036280.3C.gene	-1.50579	normal	-1.59868	down	-1.91828	down	-2.90013	down	-2.13495	down	Function unknown	Protein Mut11 OS=Chlamydomonas reinhardtii OX=3055 GN=Mut11
BraA08g016210.3C.gene	-0.942106	normal	-1.83261	down	-2.50569	down	-2.48354	down	-2.46582	down	--	--
BraA09g001490.3C.gene	-0.812866	normal	-1.28216	down	-2.29571	down	-1.52661	down	-1.70289	down	--	--
BraA09g002980.3C.gene	-0.349714	normal	-1.07439	down	-2.47664	down	-2.49643	down	-2.90487	down	--	Double-stranded RNA-binding protein 3, DRB3
BraA09g006060.3C.gene	-1.3558	normal	-2.29728	down	-3.99446	down	-3.01254	down	-2.00319	down	--	--
BraA09g007640.3C.gene	-1.3624	normal	-1.63291	down	-2.46775	down	-1.82853	down	-2.07183	down	Chromatin structure and dynamics;; Signal transduction mechanisms	F-box protein At1g78280, At1g78280
BraA09g010920.3C.gene	-1.59852	normal	-1.17521	down	-2.00684	down	-1.77508	down	-1.49088	down	--	MLO-like protein 8, MLO8
BraA09g010950.3C.gene	-2.18784	normal	-5.74368	down	-3.72858	down	-2.44861	down	-7.83385	down	Function unknown	Protein PIN-LIKES 5, PILS5
BraA09g010990.3C.gene	-0.946433	normal	-1.69874	down	-2.4703	down	-2.33123	down	-3.34308	down	Coenzyme transport and metabolism;; Amino acid transport and metabolism	Phosphoserine aminotransferase 2, chloroplastic, PSAT2
BraA09g016010.3C.gene	--	--	-1.28741	down	-1.51437	down	-1.49765	down	-1.25613	down	--	--
BraA09g021740.3C.gene	-0.762291	normal	-2.13079	down	-2.98095	down	-2.85613	down	-1.04871	down	Inorganic ion transport and metabolism;; Signal transduction mechanisms	Potassium channel KAT1, KAT1
BraA09g044620.3C.gene	-1.13469	normal	-1.45499	down	-1.8284	down	-1.76596	down	-1.25922	down	Energy production and conversion	Soluble inorganic pyrophosphatase 4, PPA4
BraA10g001620.3C.gene	-1.42964	normal	-1.7154	down	-1.9034	down	-1.36073	down	-2.32864	down	Posttranslational modification, protein turnover, chaperones	Peroxisome biogenesis protein 6, PEX6
BraA10g011840.3C.gene	-1.16538	normal	-1.06425	down	-2.46686	down	-1.50778	down	-1.84329	down	Function unknown	Guanine nucleotide-binding protein subunit beta, GB1
BraA10g023390.3C.gene	-1.11928	normal	-2.87351	down	-5.0293	down	-3.35782	down	-2.17748	down	--	--
BraA10g030920.3C.gene	-0.645818	normal	-1.29567	down	-1.23992	down	-1.28034	down	-1.13981	down	RNA processing and modification	DEAD-box ATP-dependent RNA helicase 26, RH26
BraA10g031430.3C.gene	-1.13796	normal	-1.08401	down	-1.5651	down	-1.32403	down	-1.19832	down	--	Histone-lysine N-methyltransferase, H3 lysine-9 specific SUVH1, SUVH1
Brassica_rapa_newGene_1307	-2.52655	normal	-1.60114	down	-3.10647	down	-2.81066	down	-2.21274	down	--	--
Brassica_rapa_newGene_565	-1.97278	normal	-3.35621	down	-3.89674	down	-1.77361	down	-6.06015	down	Translation, ribosomal structure and biogenesis	40S ribosomal protein S19-3, RPS19C
