# Supplementary material for: Heat stress response in Chinese cabbage (Brassica rapa L.) revealed by transcriptome and physiological analysis
Source: PeerJ. 2022 May 25;10:e13427. doi: 10.7717/peerj.13427 (PMC9147330; doi:10.7717/peerj.13427)
Supplement: Supplemental Information 5 [file peerj-10-13427-s005.xlsx]

## Sheet: Sheet1
	Table S4. List of up-regulated KEGG pathway Clusters
Cluster	KEGG Pathway	ko_ID	DEGs_Number	DEGs_id	KEGG_Orthology	Rich_Factor	P-value
1	Pentose and glucuronate interconversions	ko00040	3	BraA03g001520.3C.gene;BraA09g007740.3C.gene;BraA09g045790.3C.gene	K01728+K01728+K01728	12.5101	0.00147846
	2-Oxocarboxylic acid metabolism	ko01210	2	BraA04g008320.3C.gene;BraA05g027600.3C.gene	K12156+K00826	11.0208	0.013482
	Biosynthesis of amino acids	ko01230	2	BraA05g027600.3C.gene;BraA08g028650.3C.gene	K00826+K01079	3.3688	0.11584
	alpha-Linolenic acid metabolism	ko00592	1	BraA07g031010.3C.gene	K00454	9.89044	0.0966412
	Amino sugar and nucleotide sugar metabolism	ko00520	1	BraA10g010420.3C.gene	K01835	3.04923	0.28333
	Carbon metabolism	ko01200	1	BraA08g028650.3C.gene	K01079	1.59063	0.476782
	Circadian rhythm - plant	ko04712	1	BraA03g003460.3C.gene	K16221	10.8656	0.0883288
	Cysteine and methionine metabolism	ko00270	1	BraA05g027600.3C.gene	K00826	3.99717	0.2237
	Galactose metabolism	ko00052	1	BraA10g010420.3C.gene	K01835	8.20696	0.115383
	Glucosinolate biosynthesis	ko00966	1	BraA04g008320.3C.gene	K12156	33.5415	0.0294302
	Glycine, serine and threonine metabolism	ko00260	1	BraA08g028650.3C.gene	K01079	5.98027	0.155154
	Glycolysis / Gluconeogenesis	ko00010	1	BraA10g010420.3C.gene	K01835	3.45944	0.254056
	Linoleic acid metabolism	ko00591	1	BraA07g031010.3C.gene	K00454	38.5727	0.0256366
	Pantothenate and CoA biosynthesis	ko00770	1	BraA05g027600.3C.gene	K00826	15.1266	0.0641944
	Pentose phosphate pathway	ko00030	1	BraA10g010420.3C.gene	K01835	7.20986	0.130349
	Porphyrin and chlorophyll metabolism	ko00860	1	BraA03g053700.3C.gene	K00218	10.4251	0.0918997
	Purine metabolism	ko00230	1	BraA10g010420.3C.gene	K01835	2.8467	0.300388
	Pyrimidine metabolism	ko00240	1	BraA09g044860.3C.gene	K00761	3.58816	0.246069
	Starch and sucrose metabolism	ko00500	1	BraA10g010420.3C.gene	K01835	1.94321	0.409837
	Valine, leucine and isoleucine biosynthesis	ko00290	1	BraA05g027600.3C.gene	K00826	17.5331	0.0556112
	Valine, leucine and isoleucine degradation	ko00280	1	BraA05g027600.3C.gene	K00826	9.18398	0.103711
3	Carbon metabolism	ko01200	3	BraA03g046280.3C.gene;BraA05g034040.3C.gene;BraA08g007700.3C.gene	K01006+K00640+K00600	4.37423	0.0277224
	Biosynthesis of amino acids	ko01230	2	BraA05g034040.3C.gene;BraA08g007700.3C.gene	K00640+K00600	3.08806	0.134237
	Glutathione metabolism	ko00480	2	BraA06g012970.3C.gene;BraA09g001660.3C.gene	K00799+K00799	8.83958	0.0205976
	Phenylpropanoid biosynthesis	ko00940	2	BraA01g001360.3C.gene;BraA10g029420.3C.gene	K00430+K00430	4.81066	0.062794
	Plant hormone signal transduction	ko04075	2	BraA03g042600.3C.gene;BraA09g052310.3C.gene	K13449+K14493	2.52109	0.185973
	Sulfur metabolism	ko00920	2	BraA01g012700.3C.gene;BraA05g034040.3C.gene	K05907+K00640	21.1095	0.00385145
	Amino sugar and nucleotide sugar metabolism	ko00520	1	BraA03g022910.3C.gene	K01183	2.79513	0.304724
	Carbon fixation in photosynthetic organisms	ko00710	1	BraA03g046280.3C.gene	K01006	4.98005	0.183422
	Cyanoamino acid metabolism	ko00460	1	BraA08g007700.3C.gene	K00600	6.42879	0.145013
	Cysteine and methionine metabolism	ko00270	1	BraA05g034040.3C.gene	K00640	3.66408	0.241379
	Glycine, serine and threonine metabolism	ko00260	1	BraA08g007700.3C.gene	K00600	5.48191	0.168013
	Glyoxylate and dicarboxylate metabolism	ko00630	1	BraA08g007700.3C.gene	K00600	4.77815	0.190445
	One carbon pool by folate	ko00670	1	BraA08g007700.3C.gene	K00600	18.1325	0.0538108
	Plant-pathogen interaction	ko04626	1	BraA03g042600.3C.gene	K13449	2.32621	0.354715
	Pyruvate metabolism	ko00620	1	BraA03g046280.3C.gene	K01006	4.53312	0.199723
	Tropane, piperidine and pyridine alkaloid biosynthesis	ko00960	1	BraA04g021040.3C.gene	K08081	9.96009	0.0959664
13	Purine metabolism	ko00230	5	BraA02g003240.3C.gene;BraA02g010480.3C.gene;BraA03g012450.3C.gene;BraA07g022930.3C.gene;BraA10g030890.3C.gene	K03012+K03018+K00602+K00942+K00873	4.01457	0.00757839
	Plant-pathogen interaction	ko04626	4	BraA03g042450.3C.gene;BraA05g002200.3C.gene;BraA06g037980.3C.gene;BraA10g020140.3C.gene	K13417+K13448+K13430+K13428	2.86302	0.0496946
	Plant hormone signal transduction	ko04075	4	BraA01g016870.3C.gene;BraA01g028580.3C.gene;BraA09g057760.3C.gene;BraA10g014950.3C.gene	K14508+K14498+K13464+K14497	1.55144	0.255744
	Limonene and pinene degradation	ko00903	3	BraA03g034020.3C.gene;BraA05g020840.3C.gene;Brassica_rapa_newGene_11573	K00517+K00128+K00517	10.8795	0.00256289
	Tryptophan metabolism	ko00380	3	BraA02g033980.3C.gene;BraA05g020840.3C.gene;BraA06g022070.3C.gene	K01426+K00128+K11817	7.50309	0.00728932
	Glutathione metabolism	ko00480	3	BraA04g005290.3C.gene;BraA06g034080.3C.gene;BraA09g017610.3C.gene	K00383+K01920+K00799	4.07981	0.0366418
	Pyrimidine metabolism	ko00240	3	BraA02g003240.3C.gene;BraA02g010480.3C.gene;BraA09g050000.3C.gene	K03012+K03018+K13800	3.03614	0.0753122
	Protein processing in endoplasmic reticulum	ko04141	3	BraA03g009190.3C.gene;BraA06g001970.3C.gene;BraA10g018240.3C.gene	K08653+K13993+K09481	1.85974	0.217591
	Biosynthesis of amino acids	ko01230	3	BraA06g000220.3C.gene;BraA08g019620.3C.gene;BraA10g030890.3C.gene	K00640+K01681+K00873	1.42526	0.352448
	Carbon metabolism	ko01200	3	BraA06g000220.3C.gene;BraA08g019620.3C.gene;BraA10g030890.3C.gene	K00640+K01681+K00873	1.34592	0.386909
	Sulfur metabolism	ko00920	2	BraA06g000220.3C.gene;BraA10g012500.3C.gene	K00640+K01082	6.49522	0.0377255
	Stilbenoid, diarylheptanoid and gingerol biosynthesis	ko00945	2	BraA03g034020.3C.gene;Brassica_rapa_newGene_11573	K00517+K00517	6.12929	0.0419191
	RNA polymerase	ko03020	2	BraA02g003240.3C.gene;BraA02g010480.3C.gene	K03012+K03018	5.8808	0.0451744
	Arginine and proline metabolism	ko00330	2	BraA02g033980.3C.gene;BraA05g020840.3C.gene	K01426+K00128	4.22504	0.080914
	Pyruvate metabolism	ko00620	2	BraA05g020840.3C.gene;BraA10g030890.3C.gene	K00128+K00873	2.78961	0.160533
	Cysteine and methionine metabolism	ko00270	2	BraA06g000220.3C.gene;BraA06g034080.3C.gene	K00640+K01920	2.25482	0.222149
	Glycolysis / Gluconeogenesis	ko00010	2	BraA05g020840.3C.gene;BraA10g030890.3C.gene	K00128+K00873	1.95148	0.273487
	mRNA surveillance pathway	ko03015	2	BraA07g032170.3C.gene;Brassica_rapa_newGene_1437	K14400+K14376	1.8362	0.297512
	Spliceosome	ko03040	2	BraA05g016270.3C.gene;BraA07g040350.3C.gene	K12900+K12622	1.35149	0.43888
	Other glycan degradation	ko00511	1	BraA09g031520.3C.gene	K17108	9.46042	0.100652
	Folate biosynthesis	ko00790	1	BraA02g001870.3C.gene	K01930	7.25299	0.129275
	Histidine metabolism	ko00340	1	BraA05g020840.3C.gene	K00128	6.3997	0.145231
	One carbon pool by folate	ko00670	1	BraA03g012450.3C.gene	K00602	5.57922	0.164775
	Sphingolipid metabolism	ko00600	1	BraA09g031520.3C.gene	K17108	5.57922	0.164775
	Lysine degradation	ko00310	1	BraA05g020840.3C.gene	K00128	3.68796	0.238689
	Ascorbate and aldarate metabolism	ko00053	1	BraA05g020840.3C.gene	K00128	3.24761	0.266434
	Steroid biosynthesis	ko00100	1	BraA03g031040.3C.gene	K00227	3.24761	0.266434
	Tropane, piperidine and pyridine alkaloid biosynthesis	ko00960	1	BraA05g014740.3C.gene	K08081	3.06464	0.279935
	beta-Alanine metabolism	ko00410	1	BraA05g020840.3C.gene	K00128	2.98068	0.286594
	Fatty acid degradation	ko00071	1	BraA05g020840.3C.gene	K00128	2.71987	0.309433
	Phenylalanine metabolism	ko00360	1	BraA02g033980.3C.gene	K01426	2.59035	0.322162
	Valine, leucine and isoleucine degradation	ko00280	1	BraA05g020840.3C.gene	K00128	2.59035	0.322162
	Protein export	ko03060	1	BraA10g018240.3C.gene	K09481	2.2203	0.364938
	Citrate cycle (TCA cycle)	ko00020	1	BraA08g019620.3C.gene	K01681	2.11252	0.379569
	Glycerolipid metabolism	ko00561	1	BraA05g020840.3C.gene	K00128	1.92557	0.407851
	2-Oxocarboxylic acid metabolism	ko01210	1	BraA08g019620.3C.gene	K01681	1.55421	0.478084
	Glyoxylate and dicarboxylate metabolism	ko00630	1	BraA08g019620.3C.gene	K01681	1.4702	0.497287
	Ribosome biogenesis in eukaryotes	ko03008	1	BraA02g007540.3C.gene	K11128	1.41292	0.511235
	Pentose and glucuronate interconversions	ko00040	1	BraA05g020840.3C.gene	K00128	1.17616	0.577506
	Phagosome	ko04145	1	BraA10g018240.3C.gene	K09481	1.17616	0.577506
	RNA degradation	ko03018	1	BraA07g040350.3C.gene	K12622	1.01677	0.631525
	Ubiquitin mediated proteolysis	ko04120	1	BraA07g040510.3C.gene	K03875	0.937887	0.661603
	Oxidative phosphorylation	ko00190	1	BraA07g002540.3C.gene	K01507	0.853293	0.696573
