# Supplementary material for: Heat stress response in Chinese cabbage (Brassica rapa L.) revealed by transcriptome and physiological analysis
Source: PeerJ. 2022 May 25;10:e13427. doi: 10.7717/peerj.13427 (PMC9147330; doi:10.7717/peerj.13427)
Supplement: Supplemental Information 6 [file peerj-10-13427-s006.xlsx]

## Sheet: Sheet1
	Table S5. List of down-regulated KEGG pathway Clusters
Cluster	KEGG Pathway	ko_ID	DEGs_Number	DEGs_id	KEGG_Orthology	Rich_Factor	P-value
2	Ribosome	ko03010	13	BraA03g006230.3C.gene;BraA03g022530.3C.gene;BraA05g039290.3C.gene;BraA06g037340.3C.gene;BraA07g021650.3C.gene;BraA07g038680.3C.gene;BraA07g038940.3C.gene;BraA08g012500.3C.gene;BraA09g003330.3C.gene;BraA09g024650.3C.gene;BraA09g032140.3C.gene;BraA09g064600.3C.gene;BraA10g012700.3C.gene	K02952+K02906+K02935+K02935+K02879+K02996+K02909+K02884+K02935+K02876+K02867+K02933+K02895	0.672105	0.779572
	Photosynthesis	ko00195	7	BraA02g017820.3C.gene;BraA05g016110.3C.gene;BraA07g015790.3C.gene;BraA08g033850.3C.gene;BraA09g024970.3C.gene;BraA09g029800.3C.gene;BraA10g002150.3C.gene	K02723+K08905+K02638+K02717+K08901+K02113+K08902	1.12808	0.533402
	Porphyrin and chlorophyll metabolism	ko00860	6	BraA03g005840.3C.gene;BraA03g048280.3C.gene;BraA04g028660.3C.gene;BraA06g005680.3C.gene;BraA08g035300.3C.gene;BraA10g002190.3C.gene	K03403+K03405+K01599+K03404+K00218+K00218	0.971828	0.647133
	Carbon metabolism	ko01200	5	BraA03g035490.3C.gene;BraA03g041130.3C.gene;BraA05g003030.3C.gene;BraA07g034950.3C.gene;BraA09g033090.3C.gene	K00927+K05605+K01595+K00161+K00855	3.26888	0.264914
	Biosynthesis of amino acids	ko01230	3	BraA03g035490.3C.gene;BraA04g009580.3C.gene;BraA07g008830.3C.gene	K00927+K01915+K01687	4.3585	0.206002
	Carbon fixation in photosynthetic organisms	ko00710	3	BraA03g035490.3C.gene;BraA05g003030.3C.gene;BraA09g033090.3C.gene	K00927+K01595+K00855	3.3449	0.120063
	Nitrogen metabolism	ko00910	3	BraA04g009580.3C.gene;BraA05g040570.3C.gene;BraA09g010360.3C.gene	K01915+K01673+K00366	1.48279	0.246653
	Alanine, aspartate and glutamate metabolism	ko00250	2	BraA04g009580.3C.gene;BraA06g028460.3C.gene	K01915+K01953	11.6619	1.11903e-05
	Aminoacyl-tRNA biosynthesis	ko00970	2	BraA01g019310.3C.gene;BraA08g031350.3C.gene	K01893+K01875	5.39364	0.0179665
	Glycolysis / Gluconeogenesis	ko00010	2	BraA03g035490.3C.gene;BraA07g034950.3C.gene	K00927+K00161	2.14672	0.374552
	Oxidative phosphorylation	ko00190	2	BraA09g029800.3C.gene;BraA10g031320.3C.gene	K02113+K01507	1.34421	0.440746
	Plant hormone signal transduction	ko04075	2	BraA02g020000.3C.gene;BraA05g005770.3C.gene	K13464+K14496	1.06148	0.566708
	Purine metabolism	ko00230	2	BraA06g026850.3C.gene;BraA09g004010.3C.gene	K00940+K00939	0.749117	0.742034
	Pyruvate metabolism	ko00620	2	BraA05g003030.3C.gene;BraA07g034950.3C.gene	K01595+K00161	0.675261	0.777989
	RNA degradation	ko03018	2	BraA05g016180.3C.gene;Brassica_rapa_newGene_7088	K04077+K13126	0.668979	0.781144
	Starch and sucrose metabolism	ko00500	2	BraA01g000660.3C.gene;BraA06g036400.3C.gene	K01087+K00688	0.512765	0.909246
	Ubiquinone and other terpenoid-quinone biosynthesis	ko00130	2	BraA03g035070.3C.gene;BraA07g025380.3C.gene	K12501+K12502	0.473127	0.884665
	2-Oxocarboxylic acid metabolism	ko01210	1	BraA07g008830.3C.gene	K01687	9.77489	6.42675e-06
	alpha-Linolenic acid metabolism	ko00592	1	BraA05g016980.3C.gene	K01047	2.9869	0.000288323
	Arachidonic acid metabolism	ko00590	1	BraA05g016980.3C.gene	K01047	7.19153	0.130377
	Arginine biosynthesis	ko00220	1	BraA04g009580.3C.gene	K01915	4.95967	0.183449
	beta-Alanine metabolism	ko00410	1	BraA03g041130.3C.gene	K05605	4.79435	0.189146
	Biotin metabolism	ko00780	1	BraA03g004180.3C.gene	K02372	4.23031	0.211544
	Citrate cycle (TCA cycle)	ko00020	1	BraA07g034950.3C.gene	K00161	3.12675	0.275153
	DNA replication	ko03030	1	BraA04g018020.3C.gene	K10739	3.03867	0.0757653
	Ether lipid metabolism	ko00565	1	BraA05g016980.3C.gene	K01047	2.90567	0.150718
	Fatty acid biosynthesis	ko00061	1	BraA03g004180.3C.gene	K02372	2.82021	0.300143
	Fatty acid metabolism	ko01212	1	BraA03g004180.3C.gene	K02372	2.76597	0.305038
	Folate biosynthesis	ko00790	1	BraA05g035170.3C.gene	K01633	2.43781	0.338375
	Glycerophospholipid metabolism	ko00564	1	BraA05g016980.3C.gene	K01047	2.35788	0.208014
	Glyoxylate and dicarboxylate metabolism	ko00630	1	BraA04g009580.3C.gene	K01915	2.11515	0.378935
	Homologous recombination	ko03440	1	BraA04g018020.3C.gene	K10739	1.97028	0.400402
	Linoleic acid metabolism	ko00591	1	BraA05g016980.3C.gene	K01047	1.84398	0.421138
	Lysine degradation	ko00310	1	BraA07g024090.3C.gene	K11423	1.84398	0.295696
	Mismatch repair	ko03430	1	BraA04g018020.3C.gene	K10739	1.82064	0.4252
	mRNA surveillance pathway	ko03015	1	Brassica_rapa_newGene_7088	K13126	1.71227	0.445093
	Nucleotide excision repair	ko03420	1	BraA04g018020.3C.gene	K10739	1.39641	0.514701
	Pantothenate and CoA biosynthesis	ko00770	1	BraA07g008830.3C.gene	K01687	1.28996	0.461931
	Photosynthesis - antenna proteins	ko00196	1	BraA04g001140.3C.gene	K08908	1.12368	0.593357
	Plant-pathogen interaction	ko04626	1	BraA10g005410.3C.gene	K13436	1.02736	0.626518
	Propanoate metabolism	ko00640	1	BraA03g041130.3C.gene	K05605	0.942121	0.624565
	Protein processing in endoplasmic reticulum	ko04141	1	BraA08g019130.3C.gene	K10666	0.898941	0.675975
	Pyrimidine metabolism	ko00240	1	BraA06g026850.3C.gene	K00940	0.724587	0.770435
	RNA transport	ko03013	1	Brassica_rapa_newGene_7088	K13126	0.633615	0.799172
	Spliceosome	ko03040	1	BraA04g027350.3C.gene	K09567	0.60688	0.813074
	Steroid biosynthesis	ko00100	1	BraA09g053390.3C.gene	K08246	0.473127	0.884665
	Valine, leucine and isoleucine biosynthesis	ko00290	1	BraA07g008830.3C.gene	K01687	0.446679	0.898766
	Valine, leucine and isoleucine degradation	ko00280	1	BraA03g041130.3C.gene	K05605	0.409774	0.917999
4	Photosynthesis - antenna proteins	ko00196	9	BraA03g027230.3C.gene;BraA05g010690.3C.gene;BraA06g011900.3C.gene;BraA06g019540.3C.gene;BraA06g037410.3C.gene;BraA07g010770.3C.gene;BraA09g035160.3C.gene;BraA09g058520.3C.gene;BraA10g012410.3C.gene	K08916+K08912+K08917+K08910+K08913+K08912+K08912+K08917+K08914	97.665	0
	Photosynthesis	ko00195	7	BraA04g021840.3C.gene;BraA06g002120.3C.gene;BraA07g016040.3C.gene;BraA08g006950.3C.gene;BraA08g018830.3C.gene;BraA08g023320.3C.gene;BraA09g062800.3C.gene	K02721+K02695+K02641+K02699+K02693+K02698+K14332	25.0747	6.60447e-09
	Plant hormone signal transduction	ko04075	3	BraA02g007400.3C.gene;BraA03g008320.3C.gene;BraA06g014700.3C.gene	K14488+K14488+K14492	1.97303	0.191784
	Carbon fixation in photosynthetic organisms	ko00710	1	BraA07g022160.3C.gene	K01100	2.59829	0.322018
	Carbon metabolism	ko01200	1	BraA07g022160.3C.gene	K01100	0.760735	0.742153
	Phosphatidylinositol signaling system	ko04070	1	BraA07g022530.3C.gene	K02183	2.99965	0.285557
	Plant-pathogen interaction	ko04626	1	BraA07g022530.3C.gene	K02183	1.21367	0.568365
	Protein processing in endoplasmic reticulum	ko04141	1	BraA08g014770.3C.gene	K13993	1.05116	0.621998
	Ribosome	ko03010	1	BraA08g004460.3C.gene	K02881	0.589387	0.828795
11	Pentose and glucuronate interconversions	ko00040	3	BraA03g001520.3C.gene;BraA09g007740.3C.gene;BraA09g045790.3C.gene	K01728+K01728+K01728	12.5101	0.00147846
	2-Oxocarboxylic acid metabolism	ko01210	2	BraA04g008320.3C.gene;BraA05g027600.3C.gene	K12156+K00826	11.0208	0.013482
	Biosynthesis of amino acids	ko01230	2	BraA05g027600.3C.gene;BraA08g028650.3C.gene	K00826+K01079	3.3688	0.11584
	alpha-Linolenic acid metabolism	ko00592	1	BraA07g031010.3C.gene	K00454	9.89044	0.0966412
	Amino sugar and nucleotide sugar metabolism	ko00520	1	BraA10g010420.3C.gene	K01835	3.04923	0.28333
	Carbon metabolism	ko01200	1	BraA08g028650.3C.gene	K01079	1.59063	0.476782
	Circadian rhythm - plant	ko04712	1	BraA03g003460.3C.gene	K16221	10.8656	0.0883288
	Cysteine and methionine metabolism	ko00270	1	BraA05g027600.3C.gene	K00826	3.99717	0.2237
	Galactose metabolism	ko00052	1	BraA10g010420.3C.gene	K01835	8.20696	0.115383
	Glucosinolate biosynthesis	ko00966	1	BraA04g008320.3C.gene	K12156	33.5415	0.0294302
	Glycine, serine and threonine metabolism	ko00260	1	BraA08g028650.3C.gene	K01079	5.98027	0.155154
	Glycolysis / Gluconeogenesis	ko00010	1	BraA10g010420.3C.gene	K01835	3.45944	0.254056
	Linoleic acid metabolism	ko00591	1	BraA07g031010.3C.gene	K00454	38.5727	0.0256366
	Pantothenate and CoA biosynthesis	ko00770	1	BraA05g027600.3C.gene	K00826	15.1266	0.0641944
	Pentose phosphate pathway	ko00030	1	BraA10g010420.3C.gene	K01835	7.20986	0.130349
	Porphyrin and chlorophyll metabolism	ko00860	1	BraA03g053700.3C.gene	K00218	10.4251	0.0918997
	Purine metabolism	ko00230	1	BraA10g010420.3C.gene	K01835	2.8467	0.300388
	Pyrimidine metabolism	ko00240	1	BraA09g044860.3C.gene	K00761	3.58816	0.246069
	Starch and sucrose metabolism	ko00500	1	BraA10g010420.3C.gene	K01835	1.94321	0.409837
	Valine, leucine and isoleucine biosynthesis	ko00290	1	BraA05g027600.3C.gene	K00826	17.5331	0.0556112
	Valine, leucine and isoleucine degradation	ko00280	1	BraA05g027600.3C.gene	K00826	9.18398	0.103711
