# Supplementary material for: Heat stress response in Chinese cabbage (Brassica rapa L.) revealed by transcriptome and physiological analysis
Source: PeerJ. 2022 May 25;10:e13427. doi: 10.7717/peerj.13427 (PMC9147330; doi:10.7717/peerj.13427)
Supplement: Supplemental Information 7 [file peerj-10-13427-s007.xlsx]

## Sheet: Sheet1
Table S6. List of Cluster 8 and 15 KEGG pathway
Cluster	KEGG Pathway	ko_ID	DEGs_Number	DEGs_id	KEGG_Orthology	Rich_Factor	P-value
8	Biosynthesis of amino acids	ko01230	3	BraA02g014250.3C.gene;BraA06g005750.3C.gene;BraA06g006960.3C.gene	K00815+K01620+K00826	3.47407	0.0517773
	Phenylalanine metabolism	ko00360	3	BraA02g014250.3C.gene;BraA09g063880.3C.gene;BraA10g005300.3C.gene	K00815+K00457+K00457	18.942	0.000477443
	Tyrosine metabolism	ko00350	3	BraA02g014250.3C.gene;BraA09g063880.3C.gene;BraA10g005300.3C.gene	K00815+K00457+K00457	21.215	0.000341875
	Ubiquinone and other terpenoid-quinone biosynthesis	ko00130	3	BraA02g014250.3C.gene;BraA09g063880.3C.gene;BraA10g005300.3C.gene	K00815+K00457+K00457	18.5015	0.000511619
	Valine, leucine and isoleucine degradation	ko00280	3	BraA05g011680.3C.gene;BraA06g006960.3C.gene;BraA06g020990.3C.gene	K07513+K00826+K00253	18.942	0.000477443
	Cysteine and methionine metabolism	ko00270	2	BraA02g014250.3C.gene;BraA06g006960.3C.gene	K00815+K00826	5.49611	0.0501012
	Plant hormone signal transduction	ko04075	2	BraA03g053600.3C.gene;BraA05g009140.3C.gene	K14487+K14432	1.89082	0.286071
	2-Oxocarboxylic acid metabolism	ko01210	1	BraA06g006960.3C.gene	K00826	3.78839	0.23387
	Alanine, aspartate and glutamate metabolism	ko00250	1	BraA06g019700.3C.gene	K01953	5.35732	0.171323
	alpha-Linolenic acid metabolism	ko00592	1	BraA05g011680.3C.gene	K07513	6.79968	0.137463
	Ascorbate and aldarate metabolism	ko00053	1	BraA07g001030.3C.gene	K00469	7.91604	0.119213
	Biosynthesis of unsaturated fatty acids	ko01040	1	BraA05g011680.3C.gene	K07513	10.3995	0.0920211
	Fatty acid degradation	ko00071	1	BraA05g011680.3C.gene	K07513	6.62969	0.140743
	Fatty acid metabolism	ko01212	1	BraA05g011680.3C.gene	K07513	4.14355	0.216038
	Glycerolipid metabolism	ko00561	1	BraA07g028720.3C.gene	K01054	4.69358	0.1932
	Glycine, serine and threonine metabolism	ko00260	1	BraA06g005750.3C.gene	K01620	4.11143	0.217538
	Inositol phosphate metabolism	ko00562	1	BraA07g001030.3C.gene	K00469	4.77815	0.190108
	Isoquinoline alkaloid biosynthesis	ko00950	1	BraA02g014250.3C.gene	K00815	11.0495	0.0868357
	Limonene and pinene degradation	ko00903	1	BraA03g060680.3C.gene	K00517	8.83958	0.107412
	Pantothenate and CoA biosynthesis	ko00770	1	BraA06g006960.3C.gene	K00826	10.3995	0.0920211
	Peroxisome	ko04146	1	BraA05g011680.3C.gene	K07513	3.19503	0.271211
	Phenylalanine, tyrosine and tryptophan biosynthesis	ko00400	1	BraA02g014250.3C.gene	K00815	5.76495	0.160177
	Ribosome	ko03010	1	BraA04g012270.3C.gene	K02997	0.847244	0.706895
	Sesquiterpenoid and triterpenoid biosynthesis	ko00909	1	BraA10g021620.3C.gene	K15799	17.6792	0.0551359
	Sphingolipid metabolism	ko00600	1	BraA08g014410.3C.gene	K04718	13.5994	0.0711126
	Stilbenoid, diarylheptanoid and gingerol biosynthesis	ko00945	1	BraA03g060680.3C.gene	K00517	7.47007	0.125891
	Tropane, piperidine and pyridine alkaloid biosynthesis	ko00960	1	BraA02g014250.3C.gene	K00815	7.47007	0.125891
	Valine, leucine and isoleucine biosynthesis	ko00290	1	BraA06g006960.3C.gene	K00826	12.054	0.0798787
15	Carbon metabolism	ko01200	6	BraA01g001150.3C.gene;BraA02g037690.3C.gene;BraA04g022190.3C.gene;BraA06g003250.3C.gene;BraA06g003260.3C.gene;BraA06g037640.3C.gene	K01610+K00235+K14455+K01938+K00844+K00235	3.04158	0.140119
	Endocytosis	ko04144	5	BraA01g039770.3C.gene;BraA03g059700.3C.gene;BraA07g039360.3C.gene;BraA08g029700.3C.gene;BraA10g031450.3C.gene	K04646+K01115+K18468+K03283+K12190	2.47357	0.120939
	Plant hormone signal transduction	ko04075	5	BraA01g000430.3C.gene;BraA04g032040.3C.gene;BraA05g024080.3C.gene;BraA05g040050.3C.gene;BraA08g016610.3C.gene	K13415+K14506+K14484+K14493+K13416	1.37905	0.32979
	Plant-pathogen interaction	ko04626	5	BraA03g022660.3C.gene;BraA04g003770.3C.gene;BraA06g035910.3C.gene;BraA08g016610.3C.gene;BraA09g048110.3C.gene	K13448+K02183+K13447+K13416+K13412	1.32884	0.532282
	Oxidative phosphorylation	ko00190	4	BraA02g024930.3C.gene;BraA02g037690.3C.gene;BraA05g004400.3C.gene;BraA06g037640.3C.gene	K02145+K00235+K02257+K00235	1.69325	0.141571
	Starch and sucrose metabolism	ko00500	4	BraA01g028060.3C.gene;BraA03g011780.3C.gene;BraA05g040820.3C.gene;BraA06g003260.3C.gene	K16055+K01188+K00703+K00844	0.779892	0.733292
	Citrate cycle (TCA cycle)	ko00020	3	BraA01g001150.3C.gene;BraA02g037690.3C.gene;BraA06g037640.3C.gene	K01610+K00235+K00235	2.97546	0.28696
	Peroxisome	ko04146	3	BraA05g034270.3C.gene;BraA05g038130.3C.gene;BraA05g039380.3C.gene	K13237+K13344+K01897	1.62942	0.461524
	RNA degradation	ko03018	3	BraA04g023240.3C.gene;BraA07g039160.3C.gene;BraA10g025270.3C.gene	K12604+K12619+K12613	0.900467	0.656963
	Ubiquitin mediated proteolysis	ko04120	3	BraA03g008710.3C.gene;BraA04g021420.3C.gene;BraA07g041830.3C.gene	K10144+K03178+K03353	0.465548	0.888545
	Amino sugar and nucleotide sugar metabolism	ko00520	2	BraA06g003260.3C.gene;BraA10g021910.3C.gene	K00844+K00965	4.02562	0.22105
	Carbon fixation in photosynthetic organisms	ko00710	2	BraA01g001150.3C.gene;BraA04g022190.3C.gene	K01610+K14455	3.04158	0.281684
	Fatty acid degradation	ko00071	2	BraA01g041760.3C.gene;BraA05g039380.3C.gene	K10527+K01897	2.25117	0.0704936
	Fatty acid metabolism	ko01212	2	BraA01g041760.3C.gene;BraA05g039380.3C.gene	K10527+K01897	2.22554	0.226589
	Galactose metabolism	ko00052	2	BraA06g003260.3C.gene;BraA10g021910.3C.gene	K00844+K00965	2.13861	0.240116
	Glycerophospholipid metabolism	ko00564	2	BraA03g059700.3C.gene;BraA05g012650.3C.gene	K01115+K00968	2.04285	0.389353
	Glycolysis / Gluconeogenesis	ko00010	2	BraA01g001150.3C.gene;BraA06g003260.3C.gene	K01610+K00844	2.01281	0.39385
	Nucleotide excision repair	ko03420	2	BraA02g006590.3C.gene;BraA02g031880.3C.gene	K10838+K07466	1.73254	0.441217
	Phosphatidylinositol signaling system	ko04070	2	BraA04g003770.3C.gene;BraA05g018610.3C.gene	K02183+K00888	1.38254	0.51819
	Protein processing in endoplasmic reticulum	ko04141	2	BraA08g029700.3C.gene;BraA09g043200.3C.gene	K03283+K14001	1.22754	0.487866
	Regulation of autophagy	ko04140	2	BraA01g008260.3C.gene;BraA07g024790.3C.gene	K08333+K08334	1.08198	0.556052
	RNA transport	ko03013	2	BraA06g007220.3C.gene;BraA09g056300.3C.gene	K14297+K03243	0.888773	0.68006
	Spliceosome	ko03040	2	BraA03g015180.3C.gene;BraA08g029700.3C.gene	K12893+K03283	0.85013	0.68803
	Terpenoid backbone biosynthesis	ko00900	2	BraA01g028430.3C.gene;BraA08g016030.3C.gene	K05955+K03527	0.642587	0.794403
	2-Oxocarboxylic acid metabolism	ko01210	1	BraA04g022190.3C.gene	K14455	7.20374	0.130185
	ABC transporters	ko02010	1	BraA09g020340.3C.gene	K05658	5.0693	0.179872
	Alanine, aspartate and glutamate metabolism	ko00250	1	BraA04g022190.3C.gene	K14455	4.56237	0.197776
	alpha-Linolenic acid metabolism	ko00592	1	BraA01g041760.3C.gene	K10527	4.48757	0.0730382
	Arginine and proline metabolism	ko00330	1	BraA04g022190.3C.gene	K14455	3.98653	0.0392172
	Arginine biosynthesis	ko00220	1	BraA04g022190.3C.gene	K14455	3.50951	0.249211
	Base excision repair	ko03410	1	BraA02g026980.3C.gene	K10798	3.42177	0.115664
	Biosynthesis of amino acids	ko01230	1	BraA04g022190.3C.gene	K14455	3.04158	0.281684
	Cyanoamino acid metabolism	ko00460	1	BraA03g011780.3C.gene	K01188	2.91215	0.150198
	Cysteine and methionine metabolism	ko00270	1	BraA04g022190.3C.gene	K14455	2.85148	0.297398
	Diterpenoid biosynthesis	ko00904	1	BraA06g033010.3C.gene	K04122	2.63213	0.317825
	DNA replication	ko03030	1	BraA02g031880.3C.gene	K07466	2.53465	0.327818
	Ether lipid metabolism	ko00565	1	BraA03g059700.3C.gene	K01115	2.28118	0.356942
	Fatty acid biosynthesis	ko00061	1	BraA05g039380.3C.gene	K01897	2.28118	0.356942
	Fatty acid elongation	ko00062	1	BraA06g005040.3C.gene	K15397	2.25117	0.0704936
	Fructose and mannose metabolism	ko00051	1	BraA06g003260.3C.gene	K00844	2.147	0.115405
	Glycosylphosphatidylinositol(GPI)-anchor biosynthesis	ko00563	1	BraA02g005680.3C.gene	K05286	1.92776	0.407147
	Homologous recombination	ko03440	1	BraA02g031880.3C.gene	K07466	1.92776	0.407147
	Inositol phosphate metabolism	ko00562	1	BraA05g018610.3C.gene	K00888	1.92776	0.278159
	Isoquinoline alkaloid biosynthesis	ko00950	1	BraA04g022190.3C.gene	K14455	1.91875	0.205366
	Limonene and pinene degradation	ko00903	1	Brassica_rapa_newGene_11715	K00517	1.84961	0.420156
	Mismatch repair	ko03430	1	BraA02g031880.3C.gene	K07466	1.82495	0.42443
	mRNA surveillance pathway	ko03015	1	BraA04g026000.3C.gene	K14400	1.76988	0.239995
	Nicotinate and nicotinamide metabolism	ko00760	1	BraA07g029000.3C.gene	K03787	1.75476	0.437066
	One carbon pool by folate	ko00670	1	BraA06g003250.3C.gene	K01938	1.71089	0.326913
	Phagosome	ko04145	1	BraA02g024930.3C.gene	K02145	1.62942	0.461524
	Phenylalanine metabolism	ko00360	1	BraA04g022190.3C.gene	K14455	1.59152	0.469443
	Phenylalanine, tyrosine and tryptophan biosynthesis	ko00400	1	BraA04g022190.3C.gene	K14455	1.57323	0.473359
	Phenylpropanoid biosynthesis	ko00940	1	BraA03g011780.3C.gene	K01188	1.48773	0.492516
	Porphyrin and chlorophyll metabolism	ko00860	1	BraA05g004400.3C.gene	K02257	1.24428	0.555974
	Propanoate metabolism	ko00640	1	BraA06g016890.3C.gene	K00166	1.24428	0.555974
	Proteasome	ko03050	1	BraA02g030860.3C.gene	K03064	1.23307	0.559261
	Purine metabolism	ko00230	1	BraA07g029000.3C.gene	K03787	1.21988	0.391068
	Pyrimidine metabolism	ko00240	1	BraA07g029000.3C.gene	K03787	1.20591	0.497318
	Pyruvate metabolism	ko00620	1	BraA01g001150.3C.gene	K01610	1.11277	0.596882
	Ribosome biogenesis in eukaryotes	ko03008	1	BraA07g039160.3C.gene	K12619	0.97765	0.644827
	Sesquiterpenoid and triterpenoid biosynthesis	ko00909	1	BraA04g007810.3C.gene	K00511	0.877378	0.684804
	Steroid biosynthesis	ko00100	1	BraA04g007810.3C.gene	K00511	0.739843	0.746294
	Stilbenoid, diarylheptanoid and gingerol biosynthesis	ko00945	1	Brassica_rapa_newGene_11715	K00517	0.71287	0.75927
	Sulfur relay system	ko04122	1	BraA02g013500.3C.gene	K11996	0.709176	0.761069
	Tropane, piperidine and pyridine alkaloid biosynthesis	ko00960	1	BraA04g022190.3C.gene	K14455	0.639584	0.795944
	Tryptophan metabolism	ko00380	1	BraA10g019670.3C.gene	K11817	0.636609	0.797474
	Tyrosine metabolism	ko00350	1	BraA04g022190.3C.gene	K14455	0.577515	0.828407
	Ubiquinone and other terpenoid-quinone biosynthesis	ko00130	1	BraA07g028130.3C.gene	K02552	0.505059	0.867299
	Valine, leucine and isoleucine degradation	ko00280	1	BraA06g016890.3C.gene	K00166	0.298845	0.968339
