# Supplementary material for: Heat stress response in Chinese cabbage (Brassica rapa L.) revealed by transcriptome and physiological analysis
Source: PeerJ. 2022 May 25;10:e13427. doi: 10.7717/peerj.13427 (PMC9147330; doi:10.7717/peerj.13427)
Supplement: Supplemental Information 8 [file peerj-10-13427-s008.xlsx]

## Sheet: Sheet1
Table S7. Hub gene annotation of Cluster 15
Gene ID	Gene name	Description	KEGG_pathway	KOG/COG_class
BraA03g054960.3C.gene	TZF3	Zinc finger CCCH domain-containing protein 49	--	General function prediction only
BraA02g000470.3C.gene	PRT6	E3 ubiquitin-protein ligase PRT6	--	Posttranslational modification, protein turnover, chaperones
BraA07g041830.3C.gene	APC6	Anaphase-promoting complex subunit 6	Ubiquitin mediated proteolysis (ko04120)	Cell cycle control, cell division, chromosome partitioning;; Posttranslational modification, protein turnover, chaperones
BraA03g052020.3C.gene	NBR1	Protein NBR1 homolog	--	Function unknown
BraA02g012980.3C.gene	ARP8	Actin-related protein 8	--	Cytoskeleton
BraA06g035430.3C.gene	At5g05130	DNA/RNA helicase protein	--	Posttranslational modification, protein turnover, chaperones
BraA09g021050.3C.gene	RABF2A	Ras-related protein RABF2a	--	Intracellular trafficking, secretion, and vesicular transport
BraA04g002000.3C.gene	DRP1E	Dynamin-related protein 1E	--	Intracellular trafficking, secretion, and vesicular transport;; General function prediction only
BraA04g021420.3C.gene	UBA1	Ubiquitin-activating enzyme E1 1	Ubiquitin mediated proteolysis (ko04120)	Posttranslational modification, protein turnover, chaperones
BraA03g008710.3C.gene	MIEL1	E3 ubiquitin-protein ligase MIEL1	Ubiquitin mediated proteolysis (ko04120)	General function prediction only
