# Supplementary material for: Heat stress response in Chinese cabbage (Brassica rapa L.) revealed by transcriptome and physiological analysis
Source: PeerJ. 2022 May 25;10:e13427. doi: 10.7717/peerj.13427 (PMC9147330; doi:10.7717/peerj.13427)
Supplement: Supplemental Information 9 [file peerj-10-13427-s009.xlsx]

## Sheet: Sheet1
Table S8. Hub gene annotation of cluster 1
Gene ID	Gene name	Description	KEGG_pathway	KOG/COG_class
BraA03g007310.3C.gene	RPS7C	40S ribosomal protein S7-3	Ribosome (ko03010)	Translation, ribosomal structure and biogenesis
BraA05g041310.3C.gene	RPS7	40S ribosomal protein S7	Ribosome (ko03010)	Translation, ribosomal structure and biogenesis
BraA04g017900.3C.gene	LRP	40S ribosomal protein SA	Ribosome (ko03010)	Translation, ribosomal structure and biogenesis
BraA06g021840.3C.gene	RPS29A	40S ribosomal protein S29	Ribosome (ko03010)	Translation, ribosomal structure and biogenesis
BraA04g004080.3C.gene	RPS26B	40S ribosomal protein S26-2	Ribosome (ko03010)	Translation, ribosomal structure and biogenesis
BraA03g033770.3C.gene	RPL4A	60S ribosomal protein L4-1	Ribosome (ko03010)	RNA processing and modification
BraA07g026820.3C.gene	RPL30B	60S ribosomal protein L30-2	Ribosome (ko03010)	Translation, ribosomal structure and biogenesis
BraA10g001470.3C.gene	RPL22B	60S ribosomal protein L22-2	Ribosome (ko03010)	Translation, ribosomal structure and biogenesis
BraA06g020080.3C.gene	TOPP2	Serine/threonine-protein phosphatase PP1 isozyme 2	mRNA surveillance pathway (ko03015)	Signal transduction mechanisms;; General function prediction only
BraA01g002540.3C.gene	TRA1B	Component of the SPT module of the SAGA complex.	--	Signal transduction mechanisms;; Chromatin structure and dynamics;; Replication, recombination and repair;; Cell cycle control, cell division, chromosome partitioning
