# Supplementary material for: Heat stress response in Chinese cabbage (Brassica rapa L.) revealed by transcriptome and physiological analysis
Source: PeerJ. 2022 May 25;10:e13427. doi: 10.7717/peerj.13427 (PMC9147330; doi:10.7717/peerj.13427)
Supplement: Supplemental Information 10 [file peerj-10-13427-s010.xlsx]

## Sheet: Sheet1
Table S9. Hub gene annotation of cluster 2
Gene ID	Gene name	Description	KEGG_pathway	KOG/COG_class
BraA07g038680.3C.gene	RPS9	30S ribosomal protein S9, chloroplastic	Ribosome (ko03010)	Translation, ribosomal structure and biogenesis
BraA08g012500.3C.gene	At4g17560	50S ribosomal protein L19-1, chloroplastic	Ribosome (ko03010)	Translation, ribosomal structure and biogenesis
BraA03g022530.3C.gene	RPL3A	50S ribosomal protein L3-1, chloroplastic	Ribosome (ko03010)	Translation, ribosomal structure and biogenesis
BraA10g012700.3C.gene	RPL24	50S ribosomal protein L24, chloroplastic	Ribosome (ko03010)	Translation, ribosomal structure and biogenesis
BraA09g032140.3C.gene	RPL11	50S ribosomal protein L11, chloroplastic	Ribosome (ko03010)	Translation, ribosomal structure and biogenesis
BraA07g021650.3C.gene	RPL17	50S ribosomal protein L17, chloroplastic	Ribosome (ko03010)	Translation, ribosomal structure and biogenesis
BraA09g024650.3C.gene	RPL15	50S ribosomal protein L15, chloroplastic	Ribosome (ko03010)	Translation, ribosomal structure and biogenesis
BraA03g006230.3C.gene	RPS13	30S ribosomal protein S13, chloroplastic	Ribosome (ko03010)	Translation, ribosomal structure and biogenesis
BraA09g064600.3C.gene	RPL6	50S ribosomal protein L6, chloroplastic	Ribosome (ko03010)	Translation, ribosomal structure and biogenesis
BraA07g038940.3C.gene	RPL31	50S ribosomal protein L31, chloroplastic	Ribosome (ko03010)	Translation, ribosomal structure and biogenesis
