# Supplementary material for: Heat stress response in Chinese cabbage (Brassica rapa L.) revealed by transcriptome and physiological analysis
Source: PeerJ. 2022 May 25;10:e13427. doi: 10.7717/peerj.13427 (PMC9147330; doi:10.7717/peerj.13427)
Supplement: Supplemental Information 11 [file peerj-10-13427-s011.xlsx]

## Sheet: Sheet1
Table S10. The expression levels of enzyme-related genes
Gnen ID	S268-CK	S268-HT-4	S268-HT-8	S268-HT-10	S268-RC-4	S334-CK	S334HT-4	S334-HT-8	S334-10	S334-RC4	S334-CK_vs_S268-CK_DESeq2_FDR	S334-CK_vs_S268-CK_DESeq2_log2FC	S334-HT-4_vs_S268-HT-4_DESeq2_FDR	S334-HT-4_vs_S268-HT-4_DESeq2_log2FC	S334-HT-8_vs_S268-HT-8_DESeq2_FDR	S334-HT-8_vs_S268-HT-8_DESeq2_log2FC	S334-HT-10_vs_S268-HT-10_DESeq2_FDR	S334-HT-10_vs_S268-HT-10_DESeq2_log2FC	S334-RC-4_vs_S268-RC-4_DESeq2_FDR	S334-RC-4_vs_S268-RC-4_DESeq2_log2FC	Description
BraA01g001360.3C.gene	2.89124	6.59841	19.6286	28.7293	46.3567	2.48111	4.05822	5.42274	4.96822	3.62172	0.175343	0.728816	0.0187899	0.692345	6.47857e-05	1.92494	7.83009e-06	2.41737	2.95363e-16	3.65639	Peroxidase 50, Prx50
BraA02g044460.3C.gene	0.174274	0.0722493	0.130217	1.45142	0.125948	2.26804	6.12008	1.17471	0.173353	3.12221	0.0118259	-2.31491	--	--	0.00430792	-2.31217	--	--	--	--	Peroxidase 71, Prx71
BraA03g057860.3C.gene	1.93189	4.94941	11.4174	8.4308	7.61098	2.18051	6.20397	5.71904	6.81531	2.59028	0.810909	0.262066	0.599309	-0.286123	0.291961	0.987881	0.624942	0.419806	1.68375e-05	1.6525	Peroxidase 47, Prx47
BraA04g012660.3C.gene	1.93189	7.49623	1.83777	3.81537	3.56245	7.14326	5.20382	6.93054	5.13094	8.75138	0.398732	-0.390305	0.543015	0.493713	0.000610449	-1.67393	0.651018	-0.276748	0.00320492	-1.10654	Peroxidase 63, Prx63
BraA05g011000.3C.gene	0.577161	0.0212913	0.154008	0.0549417	0.014703	8.82499	7.74218	9.32605	8.55811	15.8671	2.1308e-07	-2.84896	4.54127e-12	-5.10819	9.79947e-23	-5.21241	5.03602e-14	-5.33978	3.84577e-35	-8.18999	Peroxidase 19, Prx19
BraA10g006200.3C.gene	3.05489	4.28688	5.93346	6.54658	4.87773	0	0	0	0	0	1.46835e-22	7.06614	9.58179e-28	6.93599	1.54646e-22	8.22848	3.40879e-29	7.71308	7.50084e-25	8.30552	Phospholipid hydroperoxide glutathione peroxidase 1, GPX1
BraA10g028260.3C.gene	0.235357	0.827189	2.23653	6.1495	5.74604	0.171984	0.259477	0.528387	0.301931	0.198532	--	--	--	--	0.190521	1.57451	1.36196e-07	3.66086	1.31554e-17	4.63017	Peroxidase 52, Prx52
BraA10g029420.3C.gene	0.0840253	1.40664	3.04482	7.55525	14.9213	0.466834	3.49169	2.80623	2.06904	0.399279	--	--	0.299715	-1.00383	0.716052	0.337921	0.0125656	1.728	4.01489e-19	4.8156	Peroxidase 54, Prx54
BraA03g059190.3C.gene	186.746	180.57	121.685	166.028	331.167	134.533	542.597	99.861	184.813	58.1266	0.0637156	0.933768	0.0970814	-1.32416	0.12027	0.451302	0.956797	-0.0304195	1.14219e-09	2.5387	Catalase 2, CAT2
BraA02g009340.3C.gene	1.72721	4.83485	2.84902	6.27855	4.62361	4.3489	11.2139	10.251	16.934	6.58073	0.266122	-0.765514	0.227711	-1.00232	0.000295857	-1.63284	0.00682091	-1.22434	0.356831	-0.34646	L-ascorbate oxidase, APX
BraA09g009290.3C.gene	6.09128	11.05	3.83611	3.44261	9.56085	33.2621	11.0825	22.1283	5.79634	11.0432	0.018182	-1.6454	0.999141	0.000981619	9.75796e-06	-2.25969	0.297539	-0.488809	0.939856	-0.0418212	L-ascorbate oxidase homolog, SKS17
BraA04g020160.3C.gene	56.5085	616.804	233.461	652.363	269.569	117.417	81.9566	28.3258	27.7852	71.3873	0.761445	-0.37203	6.83102e-06	2.51663	3.12851e-12	3.07093	5.99076e-37	4.40666	0.00535639	1.90677	Superoxide dismutase 2, SOD2
BraA09g062610.3C.gene	20.8625	109.129	49.1494	105.999	64.8265	38.4984	34.9248	17.9634	18.9149	28.8591	0.809916	-0.263866	4.16933e-05	1.56814	8.68071e-10	1.6035	2.14901e-27	2.5728	0.00523165	1.31135	Superoxide dismutase, SOD1
BraA04g005290.3C.gene	1.46635	2.59039	8.25649	6.93852	2.60583	2.74937	3.71671	3.38375	5.56463	3.41891	0.63352	-0.420265	0.046077	-0.50656	1.08899e-07	1.43965	0.434653	0.397076	0.573478	-0.233997	Glutathione reductase, GR2
BraA02g001870.3C.gene	0.833558	1.45777	10.5547	3.76717	1.91622	4.64925	3.1845	3.29435	6.58971	3.24528	0.000539244	-1.82453	0.000143313	-1.22774	0.0483257	1.29513	0.069139	-0.74841	0.0920256	-0.70548	Folylpolyglutamate synthase, FPGS1
BraA07g014210.3C.gene	15.0868	17.8462	19.2314	49.5819	40.8829	8.98152	37.394	17.0839	34.8745	4.99753	0.0168542	1.26425	0.0410394	-1.03138	0.319917	0.344121	0.284312	0.575181	6.54754e-11	3.08119	Glutamate--glyoxylate aminotransferase 1, GGT1
BraA07g035330.3C.gene	5.63566	5.30492	6.86487	23.6622	25.9034	25.1877	35.7875	15.3137	61.6805	15.6916	1.23046e-06	-1.97608	8.91367e-05	-2.59679	0.0052531	-1.45416	8.02878e-05	-1.46789	0.159224	0.621016	Glutamate--glyoxylate aminotransferase 2, GGT2
BraA09g005490.3C.gene	30.2322	30.3108	21.5609	25.849	15.7562	20.694	29.5166	19.5382	20.5468	19.7196	0.00918741	1.09239	0.866763	0.0503744	0.409298	0.309536	0.155931	0.435546	0.6678	-0.179491	Glutamate--tRNA ligase, GlRL
