# Supplementary material for: Heat stress response in Chinese cabbage (Brassica rapa L.) revealed by transcriptome and physiological analysis
Source: PeerJ. 2022 May 25;10:e13427. doi: 10.7717/peerj.13427 (PMC9147330; doi:10.7717/peerj.13427)
Supplement: Supplemental Information 12 [file peerj-10-13427-s012.xlsx]

## Sheet: Sheet1
Table S11. The expression levels of heat shock transcription factor
Gnen ID	S268-CK	S268-HT-4	S268-HT-8	S268-HT-10	S268-RC-4	S334-CK	S334HT-4	S334-HT-8	S334-10	S334-RC4	S334-CK_vs_S268-CK_DESeq2_FDR	S334-CK_vs_S268-CK_DESeq2_log2FC	S334-HT-4_vs_S268-HT-4_DESeq2_FDR	S334-HT-4_vs_S268-HT-4_DESeq2_log2FC	S334-HT-8_vs_S268-HT-8_DESeq2_FDR	S334-HT-8_vs_S268-HT-8_DESeq2_log2FC	S334-HT-10_vs_S268-HT-10_DESeq2_FDR	S334-HT-10_vs_S268-HT-10_DESeq2_log2FC	S334-RC-4_vs_S268-RC-4_DESeq2_FDR	S334-RC-4_vs_S268-RC-4_DESeq2_log2FC	Description
BraA01g001740.3C.gene	3.87634	16.8307	36.4416	12.9763	34.426	11.2034	15.5773	17.3913	15.7208	5.32566	0.136162	-0.952807	0.993062	0.0114869	0.000858138	1.21848	0.848714	-0.141426	2.16697e-27	2.81461	Heat stress transcription factor B-1, HSFB1
BraA03g017840.3C.gene	51.1683	37.2703	50.0455	48.4888	42.2426	28.0193	28.2829	24.4775	31.2265	34.8524	0.0446142	1.43704	0.0151365	0.40857	9.06748e-06	1.20093	0.000570662	0.75015	0.0516268	0.442824	Heat stress transcription factor A-4c, HSFA4C
BraA03g048540.3C.gene	28.1312	14.4418	46.7271	24.025	23.8866	32.4354	10.9559	21.679	15.5001	17.5241	0.609236	0.425195	0.103022	0.390138	0.00684393	1.27661	0.218033	0.704567	0.109775	0.62234	Heat stress transcription factor A-4a, HSFA4A
BraA03g060480.3C.gene	5.08293	9.16883	14.1332	7.55339	8.36902	12.7571	22.9774	25.4964	14.9705	20.2032	0.115563	-0.675043	6.08214e-11	-1.2872	0.11257	-0.654031	0.142385	-0.810312	0.000209628	-1.08449	Heat stress transcription factor B-1, HSFB1
BraA04g028620.3C.gene	0.556175	0.435419	2.27689	6.90615	0.600421	0	0	0	0	0	--	--	--	--	6.3726e-11	6.28057	4.03718e-21	6.97289	--	--	Heat stress transcription factor A-1, HSFA1
