# Supplementary material for: Heat stress response in Chinese cabbage (Brassica rapa L.) revealed by transcriptome and physiological analysis
Source: PeerJ. 2022 May 25;10:e13427. doi: 10.7717/peerj.13427 (PMC9147330; doi:10.7717/peerj.13427)
Supplement: Supplemental Information 13 [file peerj-10-13427-s013.xlsx]

## Sheet: Sheet1
Table S12. The expression levels of heat shock protein genes
Gnen ID	S268-CK	S268-HT-4	S268-HT-8	S268-HT-10	S268-RC-4	S334-CK	S334HT-4	S334-HT-8	S334-10	S334-RC4	S334-CK_vs_S268-CK_DESeq2_FDR	S334-CK_vs_S268-CK_DESeq2_log2FC	S334-HT-4_vs_S268-HT-4_DESeq2_FDR	S334-HT-4_vs_S268-HT-4_DESeq2_log2FC	S334-HT-8_vs_S268-HT-8_DESeq2_FDR	S334-HT-8_vs_S268-HT-8_DESeq2_log2FC	S334-HT-10_vs_S268-HT-10_DESeq2_FDR	S334-HT-10_vs_S268-HT-10_DESeq2_log2FC	S334-RC-4_vs_S268-RC-4_DESeq2_FDR	S334-RC-4_vs_S268-RC-4_DESeq2_log2FC	Description
BraA01g012570.3C.gene	0.163125	0.081488	0.419098	0.000686333	0.125379	19.7086	44.2311	92.2738	11.2858	62.1101	5.28931e-27	-5.45008	1.56517e-19	-6.10133	2.216e-07	-5.41152	6.58943e-21	-6.5625	2.49119e-33	-7.64133	15.4 kDa class V heat shock protein, HSP15.4
BraA01g015910.3C.gene	0.134731	23.6483	1.71549	2.48565	2.94015	0.895638	22.5741	6.47792	1.55382	0.88724	--	--	0.985935	-0.025228	0.000281999	-1.65846	0.274472	0.70652	0.24684	1.33338	23.6 kDa heat shock protein, HSP23.6
BraA02g013050.3C.gene	17.3801	77.6203	8.0115	2.7481	50.9577	39.7984	146.19	23.903	13.5183	37.2311	0.274519	-0.542751	0.385172	-0.841511	1.60619e-05	-1.63317	6.76348e-15	-2.07644	0.15737	0.512211	Heat shock protein 90-4, HSP90-4
BraA02g013110.3C.gene	14.1683	116.777	10.8655	7.68554	44.0133	19.3943	65.8704	9.3671	2.61915	14.3475	0.634651	0.37933	0.819515	0.265778	0.293706	0.488791	2.92823e-05	1.82292	0.0035233	1.25205	Heat shock protein 90-4, HSP90-4
BraA02g044010.3C.gene	0.302034	0.14838	1.05158	1.2077	1.49336	0	0	1.55096	0.177291	0	--	--	--	--	0.780369	-0.332115	0.0288471	2.06053	5.02374e-15	6.93133	Heat shock factor protein 8, HSF8
BraA05g012280.3C.gene	3.02112	14.2936	6.5877	2.69509	7.2013	3.87288	26.6209	7.20561	5.14133	1.99615	0.959116	0.0694254	0.398377	-0.765414	0.77719	-0.107633	0.131032	-0.75476	8.65699e-05	1.87754	Heat shock 70 kDa protein 8, HSP70-8
BraA05g037940.3C.gene	1.29727	17.0503	2.29067	2.36159	5.37855	6.20776	19.6433	3.73378	3.70084	2.66252	0.0091353	-1.38067	0.779791	-0.330323	0.0399381	-0.901739	0.250416	-0.533916	0.0809814	1.00361	Heat shock protein 90-6, HSP90-6
BraA06g001970.3C.gene	1.25016	1.74572	4.33464	3.40495	4.46722	0.318316	3.21459	5.04253	1.42775	0.567039	--	--	0.539256	-0.659013	0.338425	0.662918	0.136433	1.18977	0.000331759	2.69405	26.5 kDa heat shock protein, HSP26.5
BraA08g014770.3C.gene	24.7063	6.42255	2.92051	0.613061	4.1675	7.34535	23.3673	21.7559	0.941666	25.66	4.2393e-05	2.11128	0.317923	-1.04338	0.00849026	-2.55666	--	--	0.012829	-2.08671	15.4 kDa class V heat shock protein, HSP15.4
BraA08g029700.3C.gene	4.60558	22.8951	23.3814	5.52749	11.6674	5.89408	14.7851	12.7522	5.9726	4.84387	0.888655	0.123581	0.650375	0.436087	0.000219847	1.02133	0.977796	0.0104959	1.53231e-05	1.37865	Heat shock 70 kDa protein 5, HSP70-5
BraA08g031510.3C.gene	0.675537	1.06874	1.42884	3.36009	1.18373	0.432814	0.21147	1.11732	1.23937	0.353349	--	--	4.44417e-07	2.20322	0.487497	0.429907	0.0107864	1.45996	0.00394287	1.69159	Heat shock 70 kDa protein 16, HSP70-16
BraA10g005190.3C.gene	118.64	142.553	197.839	167.169	223.358	146.191	212.009	147.153	195.432	103.393	0.371723	0.383248	0.0490309	-0.592298	0.0864879	0.589703	0.42951	-0.288384	2.69172e-05	1.25945	18.8 kDa class II heat shock protein, SHSP-2
Brassica_rapa_newGene_7058	0.501438	1.65939	8.92484	9.75649	1.72355	0.756056	0.394483	0.490231	0.524158	2.58964	--	--	--	--	1.56345e-21	4.23655	2.43729e-19	4.01829	0.490991	-0.394037	Putative 57 kDa heat shock protein, At4g16560
Brassica_rapa_newGene_7942	0.0209017	0.25515	3.17872	5.53855	0.035345	0.0575497	0.0618797	0	0.0129887	0.270767	--	--	--	--	2.4119e-17	7.61527	1.24579e-15	5.96304	--	--	Putative 57 kDa heat shock protein, At4g16560
