# Supplementary material for: Heat stress response in Chinese cabbage (Brassica rapa L.) revealed by transcriptome and physiological analysis
Source: PeerJ. 2022 May 25;10:e13427. doi: 10.7717/peerj.13427 (PMC9147330; doi:10.7717/peerj.13427)
Supplement: Supplemental Information 14 [file peerj-10-13427-s014.xlsx]

## Sheet: Sheet1
Table S13. Specific primers for differential gene sequences for qRT-PCR
Primer	Primer sequence (5'-3')	Amplified gene
q-Br060-F	TCTCCTCCTCGCACAAGCA	BraA01g028060.3C.gene
q-Br060-R	ATAGAATCAGCCACCGCAT
q-Br260-F	GAGCGGGAGAAGCAGAAGCGAAA	BraA06g003260.3C.gene
q-Br260-R	GCAACGAGGCAACGAGAAGAGCA
q-Br910-F	TCCCAAACCTTCCTCTTGCCCCT	BraA10g021910.3C.gene
q-Br910-R	AATCCGAACCCGACGATACTCCG
q-Br710-F	GGATGGATGAAGAGATTGAAGCC	BraA03g008710.3C.gene
q-Br710-R	CATTGAGGAAGAACAGGAGGTGC
q-Br960-F	ACTCTGTCGTGTCGTCGTTTAGG	BraA03g054960.3C.gene
q-Br960-R	TTCGGGTCGGATCGGGGTTGTAG
q-Br430-F	CCGTTGATGGTTGATGTAGAG	BraA06g035430.3C.gene
q-Br430-R	CGATGACAGGTTGATTAGGAG
q-Br420-F	GGTTCTCCCACCATCCCTAT	BraA10g029420.3C.gene
q-Br420-R	AGCCAGACCTTAACTCAATT
q-Br160-F	AGGTGCTGGTGGTGCTTACTC	BraA04g020160.3C.gene
q-Br160-R	TTCCTGTGGTCCTTGTGGTTG
ACT-F	GGAGCTGAGAGATTCCGTTG	BraA10g027990.3C. gene
ACT-R	GAACCACCACTGAGGACGAT
