# Supplementary material for: Heat stress response in Chinese cabbage (Brassica rapa L.) revealed by transcriptome and physiological analysis
Source: PeerJ. 2022 May 25;10:e13427. doi: 10.7717/peerj.13427 (PMC9147330; doi:10.7717/peerj.13427)
Supplement: Supplemental Information 15 [file peerj-10-13427-s015.xlsx]

## Sheet: Raw data of Water content
Weight change of ‘268’ line under control and heat treatment
Group	Fresh weight (g）	Dry weight (g）
268-CK	100	8.21
268-WT-4	50	3.83
268-WT-8	40	3.75
268-WT-10	30	2.52
268-WT-14	40	2.83
268-HT-4	55	4.75
268-HT-8	40	5.25
268-HT-10	25	3.15
268-RC-4	25	4.32
Weight change of ‘334’ line under control and heat treatment
Group	Fresh weight（g）	Dry weight (g）
334-CK	100	6.31
334-WT-4	50	4.35
334-WT-8	40	4.18
334-WT-10	30	2.62
334-WT-14	25	2.25
334-HT-4	50	4.02
334-HT-8	50	4.88
334-HT-10	24.5	2.34
334-RC-4	25	3.07
