# Supplementary material for: Heat stress response in Chinese cabbage (Brassica rapa L.) revealed by transcriptome and physiological analysis
Source: PeerJ. 2022 May 25;10:e13427. doi: 10.7717/peerj.13427 (PMC9147330; doi:10.7717/peerj.13427)
Supplement: Supplemental Information 16 [file peerj-10-13427-s016.xlsx]

## Sheet: Raw data of Pro content 
The absorbance at 520 nm wavelength of two Chinese cabbage lines
Treatment	520nm	Treatment	520nm	Stanar curve line	520nm
268-0	0.106	334-0	0.101	0.0μg/ml	0.004
	0.12		0.097		0
	0.119		0.111		0.001
268-WT-4	0.104	334-WT-4	0.182	0.5μg/ml	0.037
	0.101		0.115		0.033
	0.111		0.122		0.045
268-WT-8	0.12	334-WT-8	0.142	1μg/ml	0.06
	0.114		0.119		0.055
	0.136		0.119		0.058
268-WT-10	0.09	334-WT-10	0.095	2μg/ml	0.094
	0.115		0.103		0.089
	0.111		0.11		0.091
268-WT-14	0.081	334-WT-14	0.114	4μg/ml	0.162
	0.091		0.1		0.156
	0.096		0.134		0.164
268-HT-4	0.098	334-HT-4	0.113	8μg/ml	0.321
	0.109		0.105		0.307
	0.115		0.117		0.311
268-HT-8	1.435	334-HT-8	0.35	10μg/ml	0.391
	1.465		0.305		0.396
	0.907		0.277		0.375
268-HT-10	1.552	334-HT-10	0.122	20μg/ml	0.599
	1.94		0.216		0.542
	1.856		0.269		0.57
268-RC-4	2.037	334-RC-4	0.183	40μg/ml	1.076
	2.6		0.236		1.086
	2.345		0.511		1.11

## Sheet: Raw data of SS content
The absorbance at 620 nm wavelength of two Chinese cabbage lines
Treatment	620nm	Treatment	620nm	Stanar curve line	620nm
268-0	0.146	334-0	0.139	0mg/ml	0.017
	0.151		0.099		0.02
	0.177		0.094		0.024
268-WT-4	0.256	334-WT-4	0.321	0.00625mg/ml	0.041
	0.305		0.294		0.038
	0.228		0.467		0.038
268-WT-8	0.236	334-WT-8	0.453	0.0125mg/ml	0.059
	0.349		0.219		0.063
	0.201		0.185		0.062
268-WT-10	0.138	334-WT-10	0.559	0.025mg/ml	0.108
	0.139		0.34		0.11
	0.149		0.303		0.112
268-WT-14	0.262	334-WT-14	0.564	0.05mg/ml	0.19
	0.19		0.529		0.18
	0.213		0.563		0.179
268-HT-4	0.162	334-HT-4	0.11	0.1mg/ml	0.377
	0.143		0.131		0.384
	0.151		0.168		0.392
268-HT-8	0.594	334-HT-8	0.939	0.2mg/ml	0.655
	0.755		0.927		0.654
	0.545		0.741		0.665
268-HT-10	0.964	334-HT-10	0.586
	1.018		0.627
	1		0.578
268-RC-4	1.588	334-RC-4	0.43
	1.407		0.367
	1.308		0.437

## Sheet: Raw data of MDA content
The absorbance of ‘268’ line at different wavelengths
Treatment	450nm	532nm	600nm	Treatment	450nm	532nm	600nm
268-0	0.17	0.183	0.012	Blank control	0.022	0.015	0.008
	0.132	0.186	0.015		0.012	0.005	0
	0.423	0.34	0.124		0.018	0.009	0.002
268-WT-4	0.218	0.241	0.064	268-HT-4	0.233	0.224	0.073
	0.229	0.192	0.013		0.11	0.135	0.007
	0.173	0.202	0.028		0.18	0.164	0.064
268-WT-8	0.113	0.19	0.006	268-HT-8	0.201	0.129	0.009
	0.113	0.179	0.006		0.316	0.208	0.022
	0.122	0.179	0.009		0.226	0.138	0.01
268-WT-10	0.116	0.152	0.004	268-HT-10	0.312	0.264	0.062
	0.108	0.162	0.007		0.307	0.28	0.017
	0.148	0.151	0.007		0.293	0.267	0.069
268-WT-14	0.099	0.109	0.005	268-RC-4	0.146	0.184	0.007
	0.128	0.153	0.007		0.169	0.158	0.012
	0.104	0.136	0.008		0.118	0.107	0.006
The absorbance of ‘334’ line at different wavelengths
Treatment	450nm	532nm	600nm	Treatment	450nm	532nm	600nm
334-0	0.127	0.203	0.008	Blank control	0.022	0.015	0.008
	0.122	0.28	0.012		0.012	0.005	0
	0.174	0.253	0.025		0.018	0.009	0.002
334-WT-4	0.137	0.373	0.008	334-HT-4	0.146	0.212	0.01
	0.272	0.406	0.082		0.274	0.315	0.081
	0.169	0.374	0.009		0.229	0.289	0.059
334-WT-8	0.156	0.327	0.006	334-HT-8	0.19	0.219	0.023
	0.117	0.252	0.005		0.182	0.232	0.009
	0.162	0.299	0.01		0.203	0.256	0.014
334-WT-10	0.135	0.215	0.008	334-HT-10	0.248	0.268	0.058
	0.162	0.245	0.021		0.196	0.218	0.024
	0.133	0.19	0.008		0.192	0.211	0.008
334-WT-14	0.24	0.283	0.058	334-RC-4	0.224	0.229	0.01
	0.286	0.325	0.082		0.274	0.295	0.011
	0.152	0.246	0.008		0.25	0.297	0.012

## Sheet: Raw data of SOD cactivity
The absorbance of ‘268’ line at 560nm wavelength
Treatment	560nm	Control	Treatment	560nm	Control
268-0	0.148	0.018	Blank control	0.621	0.003
	0.172	0.027		0.51	0.001
	0.163	0.021		0.576	0.001
268-WT-4	0.139	0.016	268-HT-4	0.108	0.015
	0.166	0.009		0.112	0.015
	0.156	0.016		0.134	0.032
268-WT-8	0.146	0.021	268-HT-8	0.151	0.027
	0.14	0.017		0.157	0.023
	0.157	0.027		0.151	0.022
268-WT-10	0.075	0.021	268-HT-10	0.11	0.021
	0.065	0.014		0.116	0.03
	0.074	0.039		0.094	0.026
268-WT-14	0.171	0.023	268-RC-4	0.086	0.048
	0.183	0.019		0.079	0.031
	0.206	0.046		0.128	0.04
The absorbance of 334 at 560nm wavelength
Treatment	560nm	Control	Treatment	560nm	Control
334-0	0.194	0.026	Blank control	0.621	0.003
	0.202	0.013		0.51	0.001
	0.18	0.012		0.576	0.001
334-WT-4	0.132	0.029	334-HT-4	0.143	0.019
	0.135	0.024		0.14	0.018
	0.143	0.038		0.155	0.023
334-WT-8	0.106	0.026	334-HT-8	0.165	0.018
	0.129	0.055		0.179	0.032
	0.129	0.027		0.154	0.022
334-WT-10	0.169	0.041	334-HT-10	0.175	0.033
	0.151	0.035		0.191	0.044
	0.163	0.024		0.209	0.081
334-WT-14	0.17	0.037	334-RC-4	0.144	0.044
	0.167	0.044		0.153	0.041
	0.186	0.085		0.176	0.041

## Sheet: Raw data of CAT activity
The absorbance at 240 nm wavelength of two Chinese cabbage lines
Treatment	A1	A2	Treatment	A1	A2
268-0	2.0667	1.9759	334-0	1.7609	1.6276
	1.9228	1.8086		1.9009	1.7108
	1.8511	1.7566		1.7404	1.6252
268-WT-4	1.7198	1.6057	334-WT-4	1.7971	1.674
	1.8098	1.6963		1.7809	1.6719
	1.9265	1.811		1.8106	1.6387
268-WT-8	1.8185	1.71	334-WT-8	1.8547	1.7374
	1.9784	1.893		1.7932	1.6337
	1.8164	1.711		2.0482	1.9944
268-WT-10	1.9386	1.8933	334-WT-10	2.0671	1.9981
	2.0309	1.9859		2.0216	1.9705
	2.0652	1.9958		2.0421	1.9672
268-WT-14	1.9461	1.905	334-WT-14	2.0606	1.9557
	1.9368	1.9082		2.015	1.9181
	1.9542	1.9077		2.0939	1.9818
268-HT-4	1.8141	1.617	334-HT-4	1.6872	1.4523
	1.7708	1.4785		1.6573	1.4301
	1.7937	1.5785		1.7151	1.4603
268-HT-8	1.8532	1.7245	334-HT-8	1.9339	1.6752
	2.1168	1.9496		1.7464	1.4447
	1.8841	1.734		1.7675	1.4397
268-HT-10	1.9693	1.744	334-HT-10	1.7945	1.5176
	1.8943	1.5636		1.8027	1.483
	1.8113	1.5598		1.7621	1.4456
268-RC-4	1.9287	1.5802	334-RC-4	1.8317	1.5546
	1.8396	1.5152		1.7908	1.4918
	2.1105	1.8182		2.0458	1.8149
A1 means immediately detect the absorbance of the working fluid ; A2 means the absorbance of the working fluid is tested after standing for one minute.
